# Supplementary material
Source: publisher site journal article supplement (https://www.spandidos-publications.com/5115/downloadSupplementary)
Supplement: Supplementary file 2 [file downloadSupplementary]

## Sheet: Table S18
Table SXVIII. The correlation of DNase genes expression and RNAss.
Cancer type	DNASE1	DNASE1L1	DNASE1L2	DNASE1L3	DNASE2	DNASE2B
ACC	0.0708026	-0.067186	0.307933	-0.338838	-0.0938934	0.0561511
BLCA	0.0029198	-0.194236	0.145019	-0.199887	-0.0447418	-0.104097
BRCA	-0.137404	-0.120336	-0.111662	-0.417849	0.151915	-0.234846
CESC	-0.162359	-0.190112	0.0405754	0.100813	0.054298	0.0387173
CHOL	0.179408	-0.338481	-0.0046332	-0.0674389	-0.182497	-0.0253556
COAD	-0.205235	-0.249899	-0.0330476	-0.133441	-0.0988031	-0.10407
DLBC	-0.235345	-0.455059	0.467	-0.373969	-0.19898	-0.288506
ESCA	0.041152	-0.0334964	0.0844545	-0.137062	0.023957	-0.09116
GBM	0.101453	-0.475803	0.182171	0.0762416	-0.361673	0.14863
HNSC	0.230899	-0.339035	0.110634	0.0538332	0.105325	-0.219348
KICH	-0.00860806	0.278663	0.369322	-0.264332	0.130632	-0.133547
KIRC	-0.0825288	0.0849852	-0.156526	-0.346177	0.279683	0.0606446
KIRP	-0.315508	-0.107011	-0.00927686	-0.0435087	-0.0167474	-0.159195
LAML	-0.0500079	-0.443536	-0.0593843	-0.0264753	-0.478161	0.124514
LGG	0.132592	-0.412587	0.0842107	-0.0133648	-0.458402	-0.400173
LIHC	-0.0356723	-0.2627	0.0801543	-0.365636	0.0213052	-0.0903051
LUAD	-0.0946927	-0.118575	0.0711978	-0.309356	-0.1758	-0.392586
LUSC	-0.0402672	-0.374605	0.0234677	0.0470952	0.103655	-0.260173
MESO	-0.0971084	0.0126327	0.309703	-0.158546	0.202491	0.0227229
OV	-0.105253	-0.14745	0.0834761	-0.199079	0.276621	-0.105749
PAAD	0.0599832	0.204327	0.170189	-0.241299	-0.0568697	-0.213096
PCPG	0.29788	0.188963	0.15419	-0.350865	0.257393	-0.0198447
PRAD	0.111851	0.214439	0.0744792	-0.519699	-0.25346	0.18782
READ	-0.240515	-0.446236	0.000183338	0.0365697	-0.117027	-0.0319155
SARC	0.150129	0.0460326	0.232175	-0.218062	0.204673	0.0899765
SKCM	-0.0512211	-0.0249974	-0.0834709	-0.200738	-0.149297	-0.0243457
STAD	0.0187612	-0.0195785	0.301993	-0.151143	0.0379017	-0.132326
TGCT	-0.605491	-0.674738	0.0990171	-0.0272502	-0.335046	-0.141411
THCA	-0.133441	0.0548648	-0.283591	0.0578569	0.381399	-0.205655
THYM	-0.0768124	-0.410504	0.27845	0.324726	-0.364934	0.142219
UCEC	-0.165284	-0.0230642	-0.036007	-0.254443	0.261029	-0.0172213
UCS	0.00539986	-0.0665072	0.266507	-0.309706	0.101572	-0.0903629
UVM	-0.18113	0.0858181	-0.0772639	-0.298758	-0.168097	-0.324666
